# Supplementary material
Source: publisher figshare collection journal article supplement (https://acs.figshare.com/ndownloader/files/5750556)
Supplement: Supplementary file 1 [file 5750556]

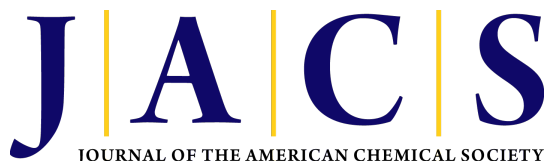

J | A | C | S  
JOURNAL OF THE AMERICAN CHEMICAL SOCIETY

J. Am. Chem. Soc., 1996, 118(46), 11682-11683, DOI: [10.1021/ja961012g](https://doi.org/10.1021/ja961012g)

#### Terms & Conditions

Electronic Supporting Information files are available without a subscription to ACS Web Editions. The American Chemical Society holds a copyright ownership interest in any copyrightable Supporting Information. Files available from the ACS website may be downloaded for personal use only. Users are not otherwise permitted to reproduce, republish, redistribute, or sell any Supporting Information from the ACS website, either in whole or in part, in either machine-readable form or any other form without permission from the American Chemical Society. For permission to reproduce, republish and redistribute this material, requesters must process their own requests via the RightsLink permission system. Information about how to use the RightsLink permission system can be found at <http://pubs.acs.org/page/copyright/permissions.html>

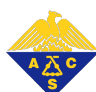

ACS Publications

MOST TRUSTED. MOST CITED. MOST READ.

Copyright © 1996 American Chemical Society

**SUPPORTING  
INFORMATION**

## Supporting Information for

**Synthesis and Isolation of One Isomer of C<sub>60</sub>H<sub>6</sub>**

Mark S. Meier,\* Brad Weedon, and H. Peter Spielmann

1. Experimental Procedure
2. <sup>13</sup>C NMR Spectra of 1
  - a) <sup>1</sup>H-<sup>13</sup>C Decoupled spectrum
  - b) <sup>1</sup>H-<sup>13</sup>C Coupled spectra
  - c) Expansion of the downfield region
3. UV/visible Spectra of the major and minor isomers of C<sub>60</sub>H<sub>6</sub>
4. FABS Mass Spectrum

**1. Experimental Procedures - Preparation of C<sub>60</sub>H<sub>6</sub>**

Zn-Cu couple was prepared from Zn dust and aqueous Cu(SO<sub>4</sub>)<sub>2</sub> as described by Ekong.<sup>1</sup> C<sub>60</sub> (60.1 mg, 0.0835 mmol) and 60 mL toluene were combined in a 100 mL 3-neck flask and deoxygenated with argon. Zn-Cu couple (1.2003 g, 18.36 mmol Zn) and water (0.75 mL) were added. The resulting mixture was heated in a 50 °C oil bath and stirred vigorously with a 3/4" x 3/8" egg-shaped magnetic stir bar. After 3 hours the mixture was cooled to room temperature, the supernatant was decanted and the residual solid was washed twice with 1.5 mL portions of toluene. The combined supernatant and washings were concentrated, filtered through a 0.2 μm nylon filter, and purified by HPLC as described in the text. The C<sub>60</sub>H<sub>6</sub> band (21.2 mg) was isolated as a 5:1 mixture of two peaks in 35% yield.

2. a)  $^1\text{H}$  -  $^{13}\text{C}$  Decoupled NMR Spectrum of **1**.

Peak List (9:1  $\text{CS}_2$ /acetone- $\text{d}_6$ , 125 MHz)  $\delta$  158.05, 153.97, 153.66, 151.65, 151.45, 145.71, 144.18, 142.60, 141.55, 52.28.

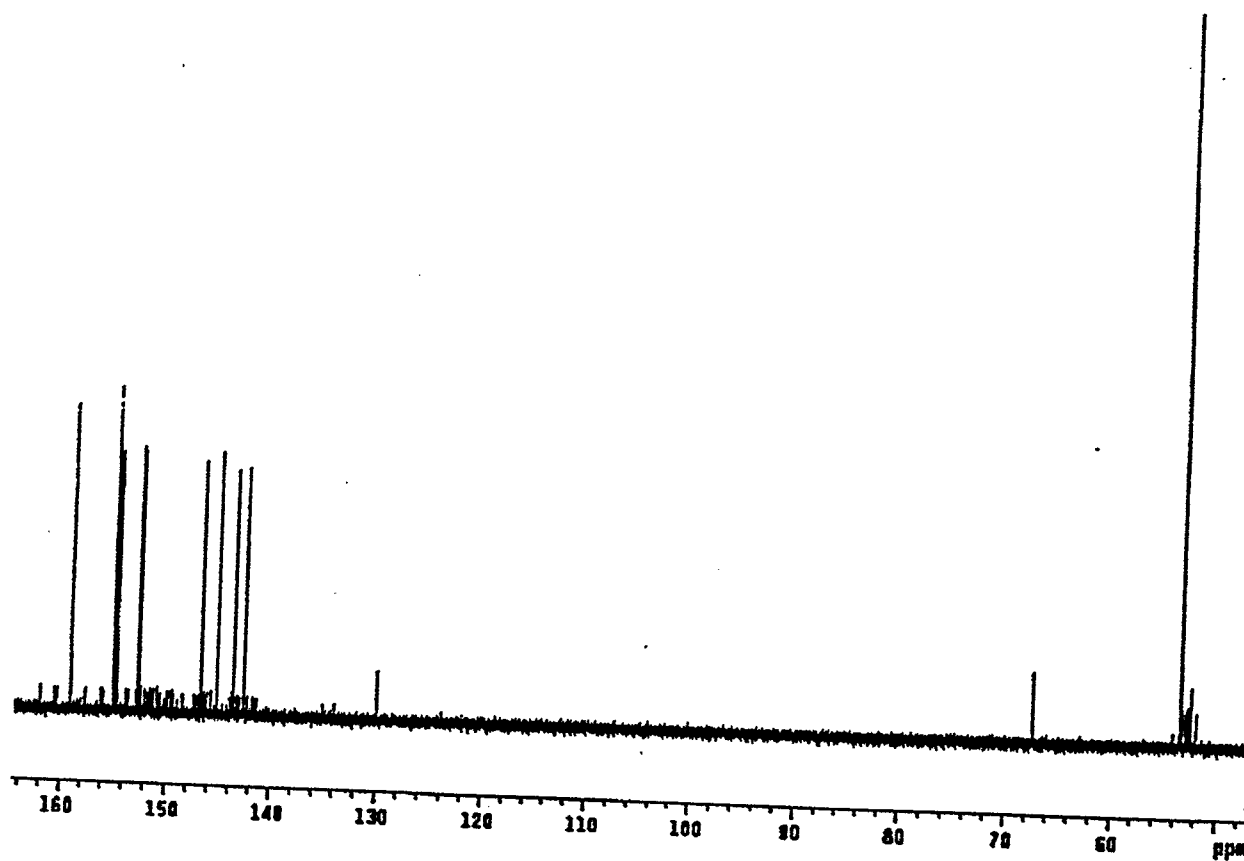

2 b)  $^1\text{H}$  -  $^{13}\text{C}$  Coupled Spectrum of 1.

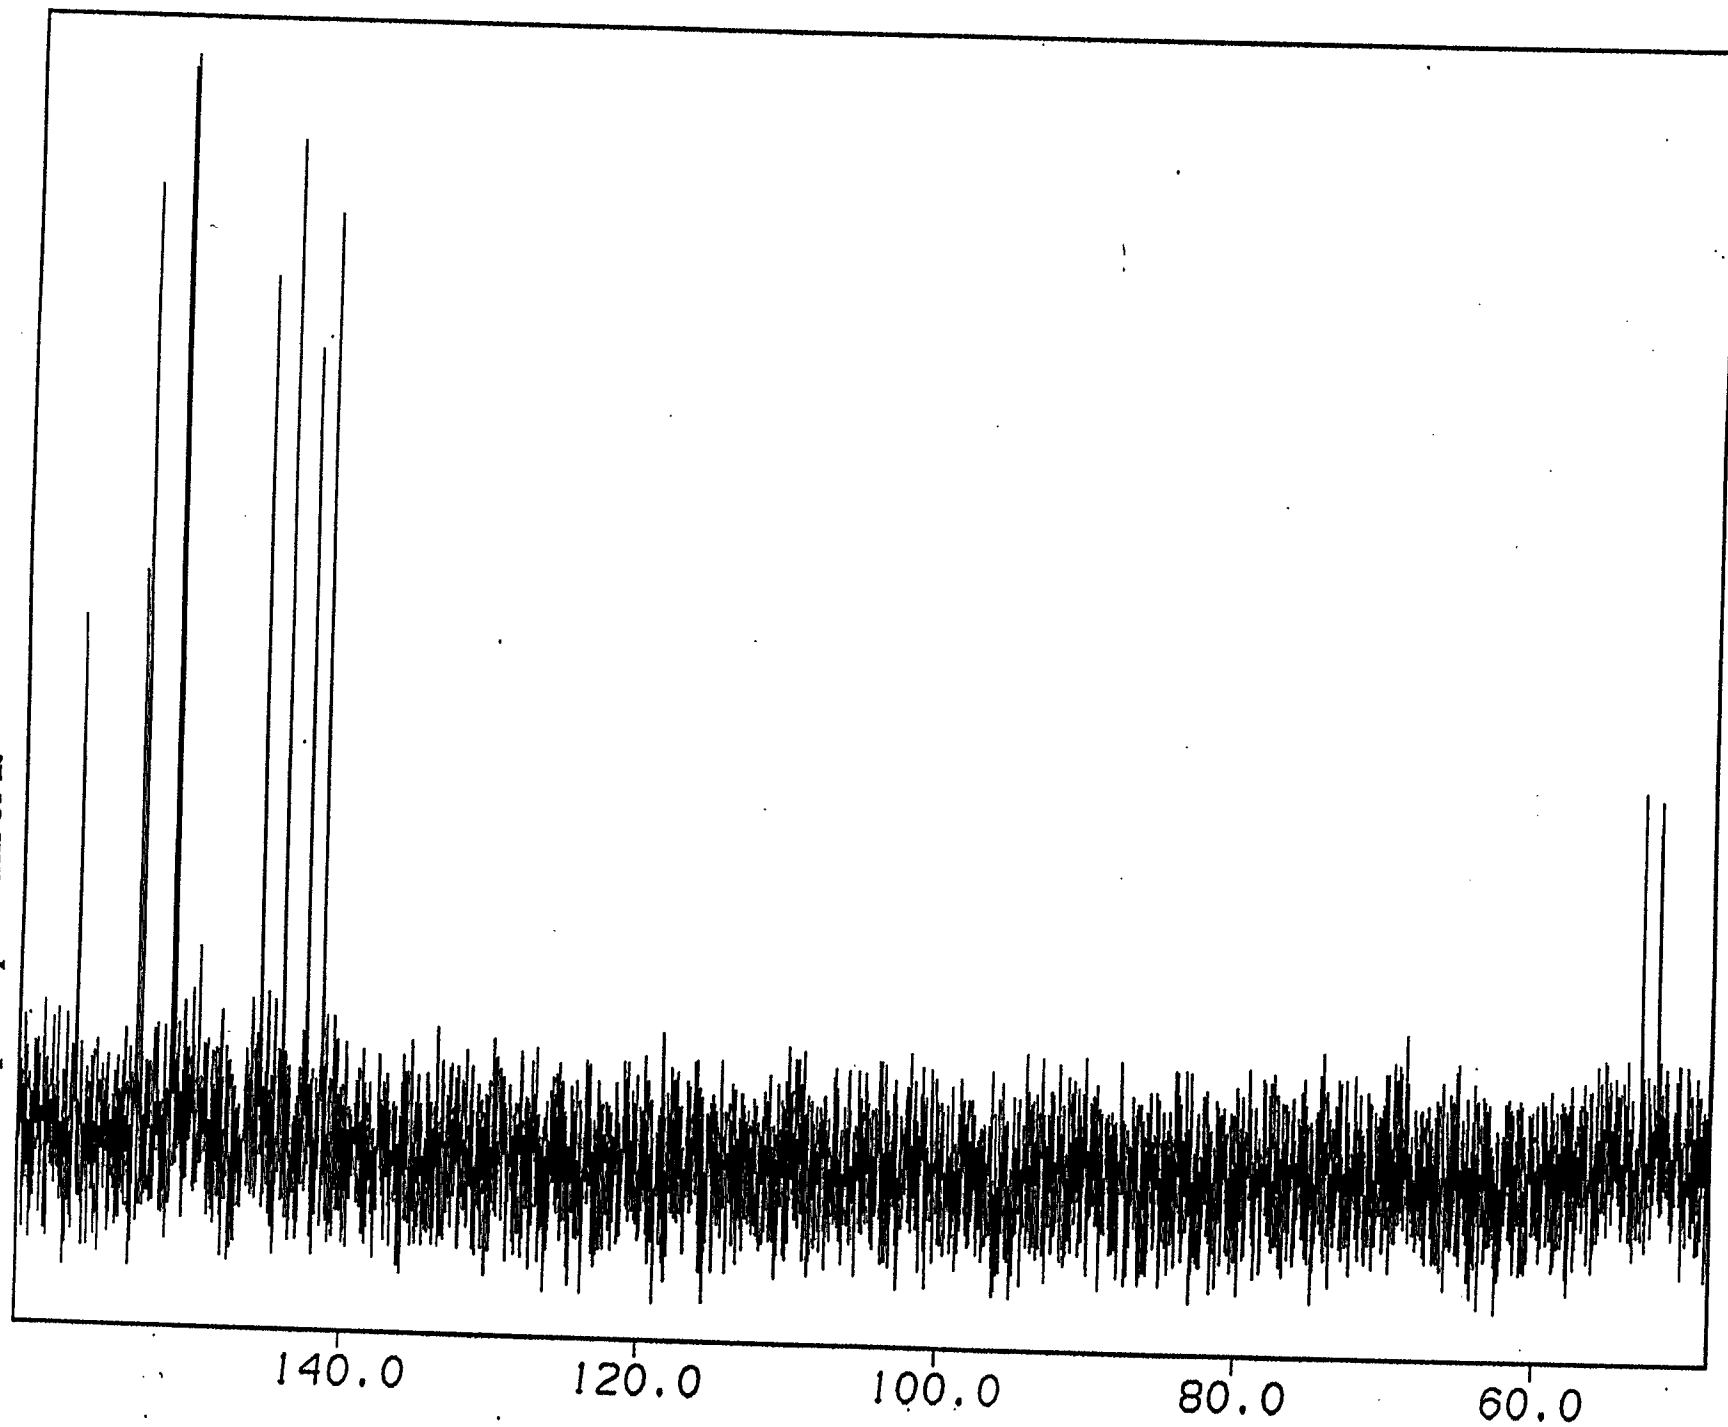

2 c) Expansion of the downfield region of the  $^1\text{H}$  -  $^{13}\text{C}$  Coupled Spectrum of **1**.

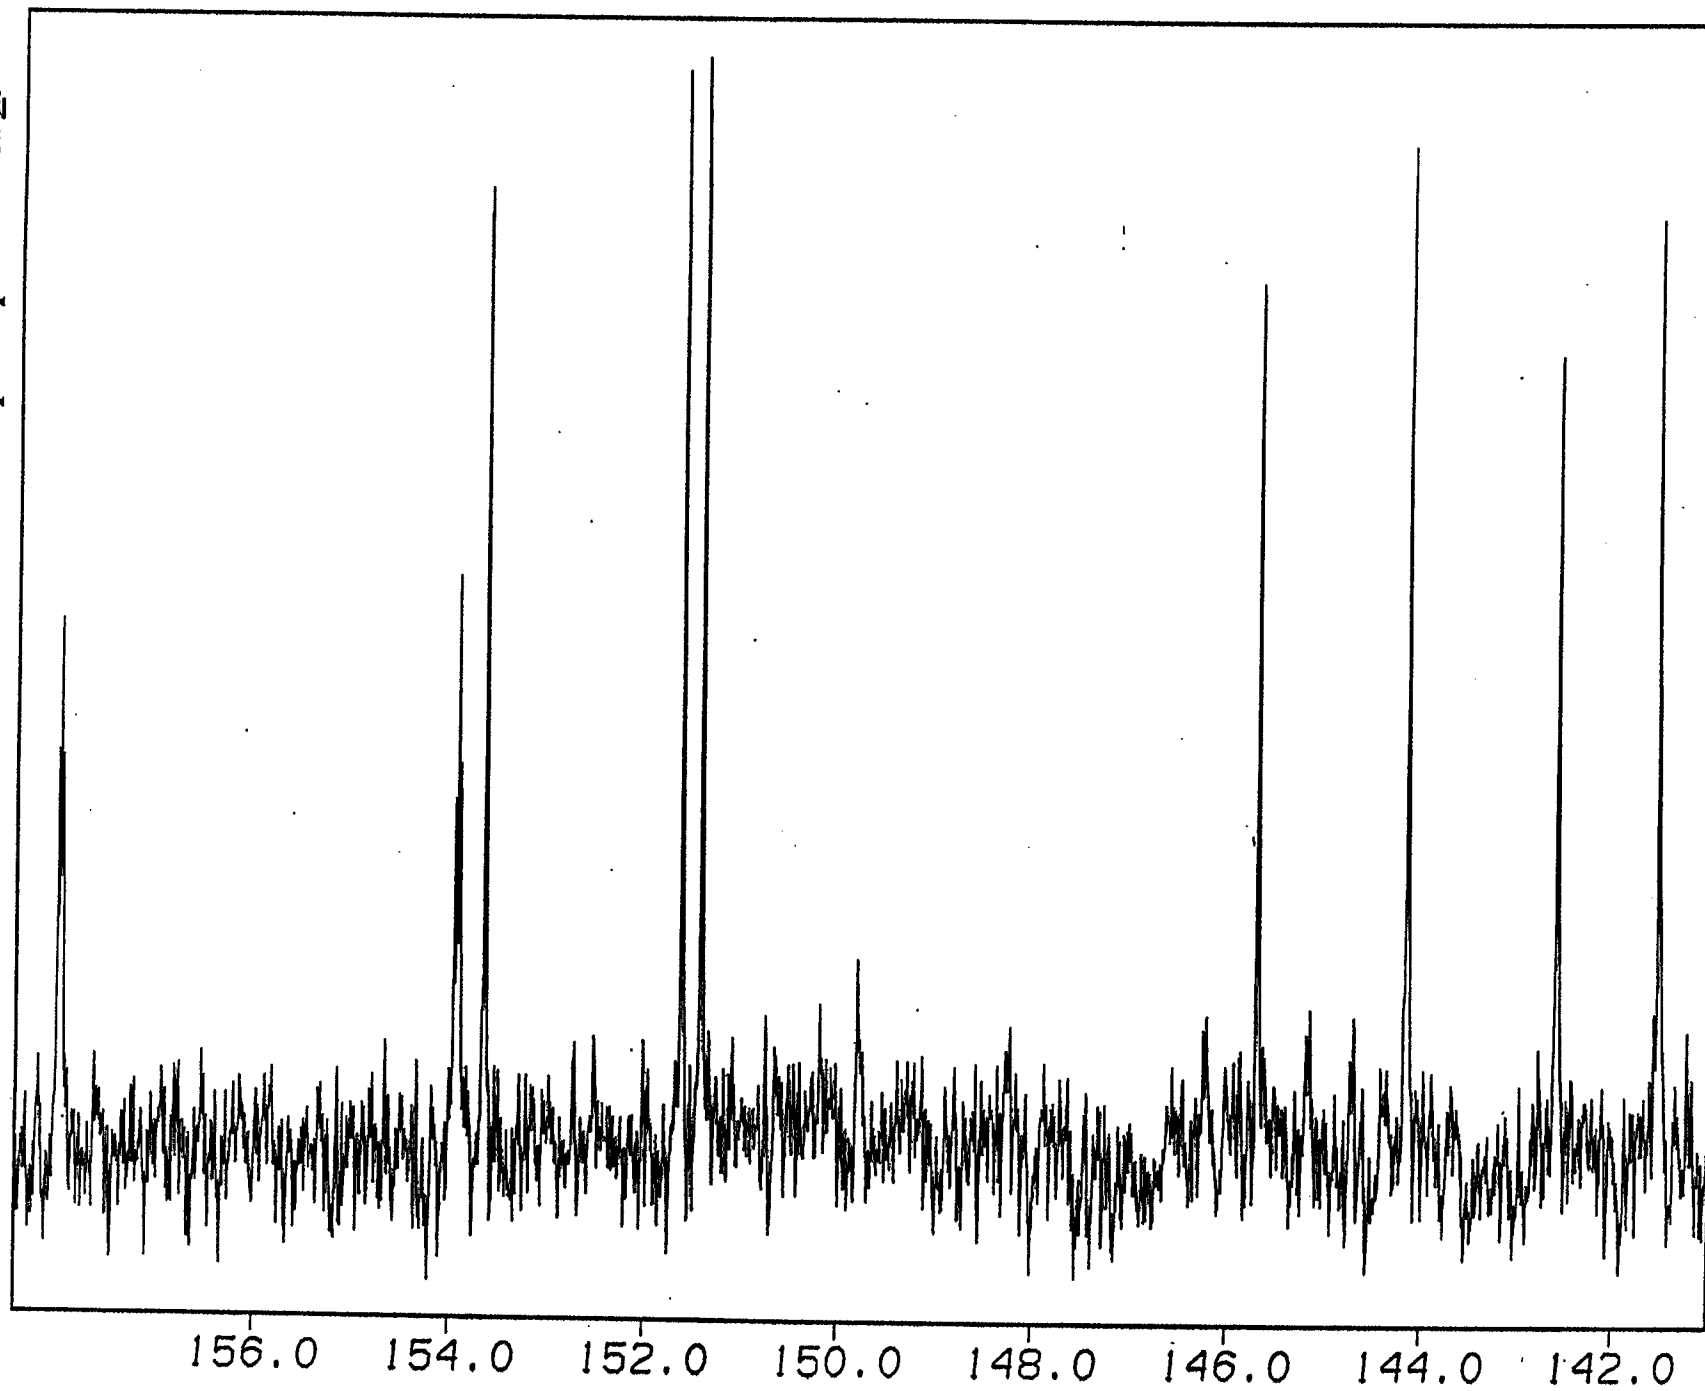

### 3. UV/Visible spectra of the major and minor isomers of $C_{60}H_6$

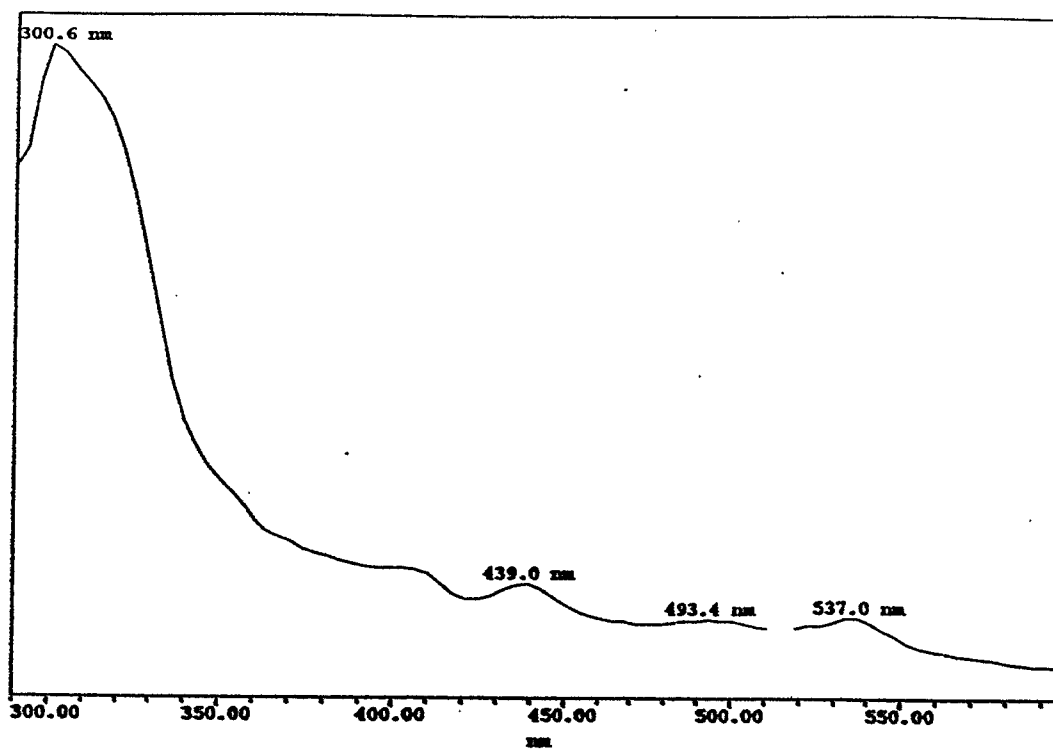

Major isomer (1)

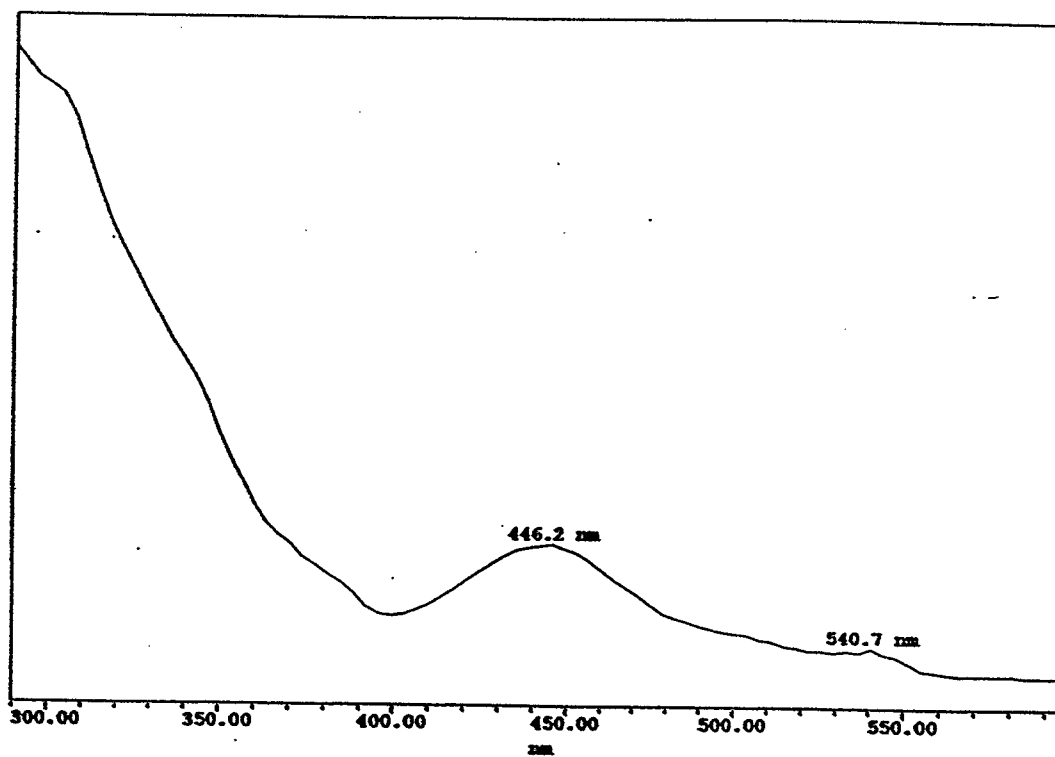

Minor isomer

#### 4. FABS Mass Spectrum of C<sub>60</sub>H<sub>6</sub> Major Isomer

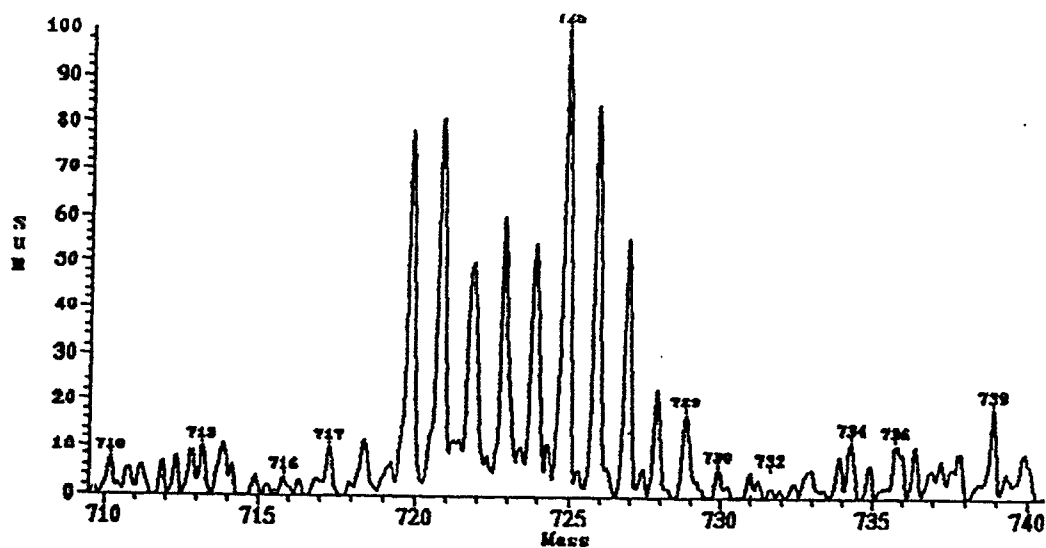

Negative-Ion FABS Mass Spectrum (*m*-nitrobenzyl alcohol matrix).
